# Supplementary material for: Concomitant fragile X-associated tremor ataxia syndrome and Parkinson's disease: a clinicopathological report of two cases
Source: PubMed Central journal article supplement — J Neurol Neurosurg Psychiatry. 2014 Dec 4;86(8):934–6. doi: 10.1136/jnnp-2014-309460 (PMC4516009; doi:10.1136/jnnp-2014-309460), 2014-12-04
Supplement: jnnp-2014-309460-s1.pdf [file jnnp-2014-309460-s1.pdf]

**Supplemental Table:** Clinical, genetic and imaging findings of 30 FXTAS cases with functional neuroimaging reported in the literature.

|                                                                     | Clinical findings |                 | CGG repeats | MCP sign | SPECT    |          |
|---------------------------------------------------------------------|-------------------|-----------------|-------------|----------|----------|----------|
|                                                                     | Symptoms          | L-Dopa response |             |          | DaTSCAN  | IBZM     |
| <b>Zuhlke et al;</b><br><b>1 female</b><br><b>(J Neurol 2004)</b>   | T, A, N, P        | -               | 84          | N        | Abnormal | Abnormal |
| <b>Ceravolo et al;</b><br><b>4 males</b><br><b>(Neurology 2005)</b> | T, A, P           | -               | 105         | Y        | Normal   | -        |
|                                                                     | T, P              | -               | 73          | N        | Normal   | -        |
|                                                                     | A, C, AutD, P     | N               | 85          | N        | Normal   | -        |
|                                                                     | T, P              | N               | 97          | -        | Normal   | -        |
| <b>Kamm et al;</b><br><b>1 male</b><br><b>(Brain 2005)</b>          | T, P, A, AutD     | N               | 61          | N        | -        | Abnormal |
| <b>Scaglione et al;</b><br><b>5 Males</b><br><b>(J Neurol 2008)</b> | T, P, G, A        | -               | 103         | Y        | Normal   | -        |
|                                                                     | T, P, G, A        | -               | 80          | Y        | -        | -        |
|                                                                     | T, P, A           | N               | 91          | Y        | Abnormal | Abnormal |
|                                                                     | T, P, G, A        | N               | 97          | Y        | Abnormal | -        |
|                                                                     | T, P, A           | -               | 95          | Y        | Abnormal | -        |

|                                                                                               |                                          |                       |                        |                     |                                    |                        |
|-----------------------------------------------------------------------------------------------|------------------------------------------|-----------------------|------------------------|---------------------|------------------------------------|------------------------|
| <b>Apartis et al;</b><br><b>4 females, 18 males*</b><br><b>(Neurology 2012)</b>               | A (91%)<br>T (86%)<br>P (64%)<br>C (55%) | N (3/3)               | 102                    | 64% (14/22)         | 47% (7/15)<br>abnormal             | -                      |
| <b>Hall et al;</b><br><b>2 females, 1 male</b><br><b>(Parkinsonism Relat<br/>Disord 2010)</b> | T, P<br><br>T, P, C<br><br>T, P          | Y<br><br>Y<br><br>Y** | 41<br><br>51<br><br>60 | N<br><br>N<br><br>N | Normal<br><br>Normal<br><br>Normal | -<br><br>-<br><br>-    |
| <b>Healy et al (case 1)</b><br><b>(Mov Disord 2009)</b>                                       | T, P, N, A                               | N                     | 72                     | Y                   | Abnormal                           | Abnormal               |
| <b>&amp; De Pablo-<br/>Fernandez et al<br/>(case 2)</b><br><b>2 males</b>                     | T, P, A, G                               | N                     | 100                    | N                   | Abnormal                           | -                      |
| <b>Total:</b>                                                                                 |                                          | Y 23% (3/13)          |                        | Y 57% (21/37)       | Abnormal<br>45% (13/29)            | Abnormal<br>100% (4/4) |

\* Only 15 patients with functional neuroimaging available

\*\* responded to pramipexole

Abbreviations: A, ataxia; AutD, autonomic dysfunction; C, cognitive decline; DaTSCAN, striatal dopamine transporter SPECT; G, vertical gaze palsy; IBZM, striatal postsynaptic D2 receptor SPECT; MCP, middle cerebellar peduncle; N, no; P, parkinsonism; T, tremor; Y, yes.
